# Supplementary material
Source: Elsevier journal article supplement (https://www.sciencedirect.com/science/article/pii/S1885585716301517)

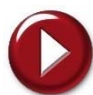

## Supplementary Material

---

### **Usefulness of a Cardiovascular Polypill in the Treatment of Secondary Prevention Patients in Spain: A Cost-effectiveness Study**

Vivencio Barrios,<sup>a,\*</sup> Lisette Kaskens,<sup>b</sup> José María Castellano,<sup>c-e</sup> Juan COSIN Sales,<sup>f</sup>  
José Emilio Ruiz,<sup>b</sup> Ilonka Zsolt,<sup>b</sup> Valentín Fuster,<sup>c,d</sup> and Alfredo GRACIA<sup>b</sup>

<sup>a</sup>Departamento de Cardiología Adultos, Hospital Universitario Ramón y Cajal, Madrid, Spain

<sup>b</sup>Departamento Científico, Ferrer, Barcelona, Spain

<sup>c</sup>Fundación Centro Nacional de Investigaciones Cardiovasculares Carlos III, Madrid, Spain

<sup>d</sup>Icahn School of Medicine Mount Sinai, New York, United States

<sup>e</sup>Servicio de Cardiología, HM Hospitales, Hospital Universitario HM Montepíncipe, Boadilla del Monte, Madrid, Spain

<sup>f</sup>Servicio de Cardiología, Hospital Arnau de Vilanova, Valencia, Spain

---

**MATERIAL SUPLEMENTARIO**

## Supuestos de adherencia en cuanto al caso base y los análisis alternativos del modelo

La proporción máxima (punto de partida) de adherencia se supone que es de  $0,9 \pm 20\%$  con ambos tratamientos: policomprimido y monocomponentes. Los valores mínimos de las adherencias (a largo plazo) al policomprimido y los monocomponentes es de  $0,76 \pm 0,01$  y  $0,49 \pm 0,02$  respectivamente (tomado de Webster et al, cita 11 del artículo)

En ambos brazos de comparación, la adherencia disminuye en un periodo y alcanza un valor constante después de 15 meses. Tras sufrir un evento cardiovascular no mortal, la adherencia actual del paciente no se restablece al inicio de la curva de adherencia

Los pacientes no adherentes no reciben beneficio alguno del tratamiento y tienen el mismo riesgo basal de eventos cardiovasculares

Para el análisis del escenario que permite a los pacientes ser adherentes a 3, 2, 1 o 0 fármacos, los supuestos de adherencia a ácido acetilsalicílico y estatina se basan en el estudio SPACE (cita 11 del artículo) (23) y el de los inhibidores de la enzima de conversión de la angiotensina se basa en Bagnall et al<sup>1</sup>. Dado que no se proporcionaron datos sobre los inhibidores de la enzima de conversión de la angiotensina en el estudio SPACE, para permitir el cambio con el tiempo el modelo requiere parámetros para el máximo o la proporción adherente de inicio y el mínimo o la proporción adherente a largo plazo y el tiempo durante el que se ha observado que cambia la adherencia. El primer punto de tiempo en que se recogieron datos fue 6 meses después de la aleatorización; la proporción de la población adherente en ese momento se tomó como la adherencia máxima. El punto final del seguimiento fue a los 18 meses, y la adherencia en ese momento se tomó como la adherencia mínima. El tiempo para pasar del máximo al mínimo, por lo tanto, era 1 año

*Proporciones de adherencia*

Proporción máxima adherente a ácido acetilsalicílico =  $926/978 = 0,95$

Proporción mínima adherente a ácido acetilsalicílico =  $475/522 = 0,91$

Proporción máxima adherente a inhibidores de la enzima de conversión de la angiotensina =  $0,65$

Proporción mínima adherente a inhibidores de la enzima de conversión de la angiotensina =  $0,60$

Proporción máxima adherente a estatina =  $911/978 = 0,93$

Proporción mínima adherente a estatina =  $469/522 = 0,90$

Proporción máxima adherente a ácido acetilsalicílico =  $953/977 = 0,98$

Proporción mínima adherente a ácido acetilsalicílico =  $486/524 = 0,93$

## BIBLIOGRAFÍA

1. Bagnall AJ, Yan AT, Yan RT, Lee CH, Tan M, Baer C, et al. Optimal medical therapy for non-st-segment-elevation Acute coronary syndromes exploring why physicians do not prescribe evidence-based treatment and why patients discontinue medications after discharge. *Circ Cardiovasc Qual Outcomes*. 2010;3:530-7.

## FIGURAS MATERIAL SUPLEMENTARIO

Diagramas de tornado del ratio coste efectividad incremental, los costes incrementales y los resultados incrementales para el policomprimido comparado con los monocomponentes.

AAS: ácido acetilsalicílico; ACV: accidente cerebrovascular, AVAC: año de vida ajustado por calidad; ECV: episodio cerebrovascular, ICC: insuficiencia cardiaca congestiva IM: infarto de miocardio, IECA: inhibidores de la enzima de conversión de la angiotensina; RCEI: ratio coste efectividad incremental.

## RCEI (Policomprimido vs. monocomponentes)

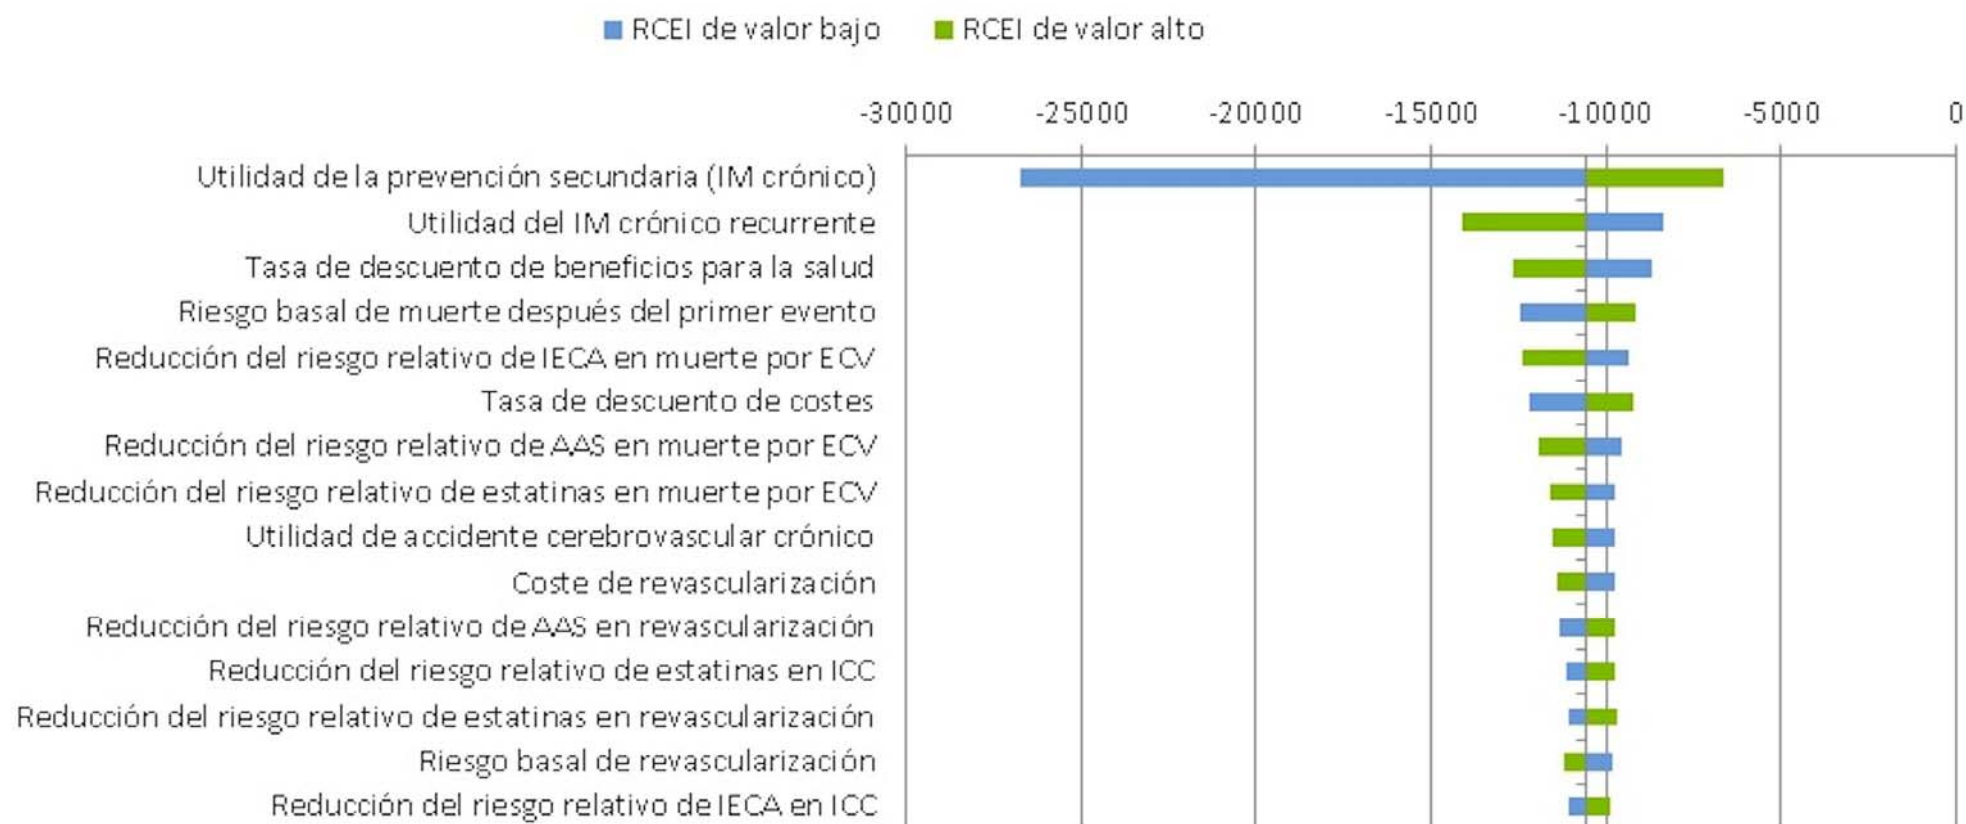

### Costes incrementales (Policomprimido vs. monocomponentes)

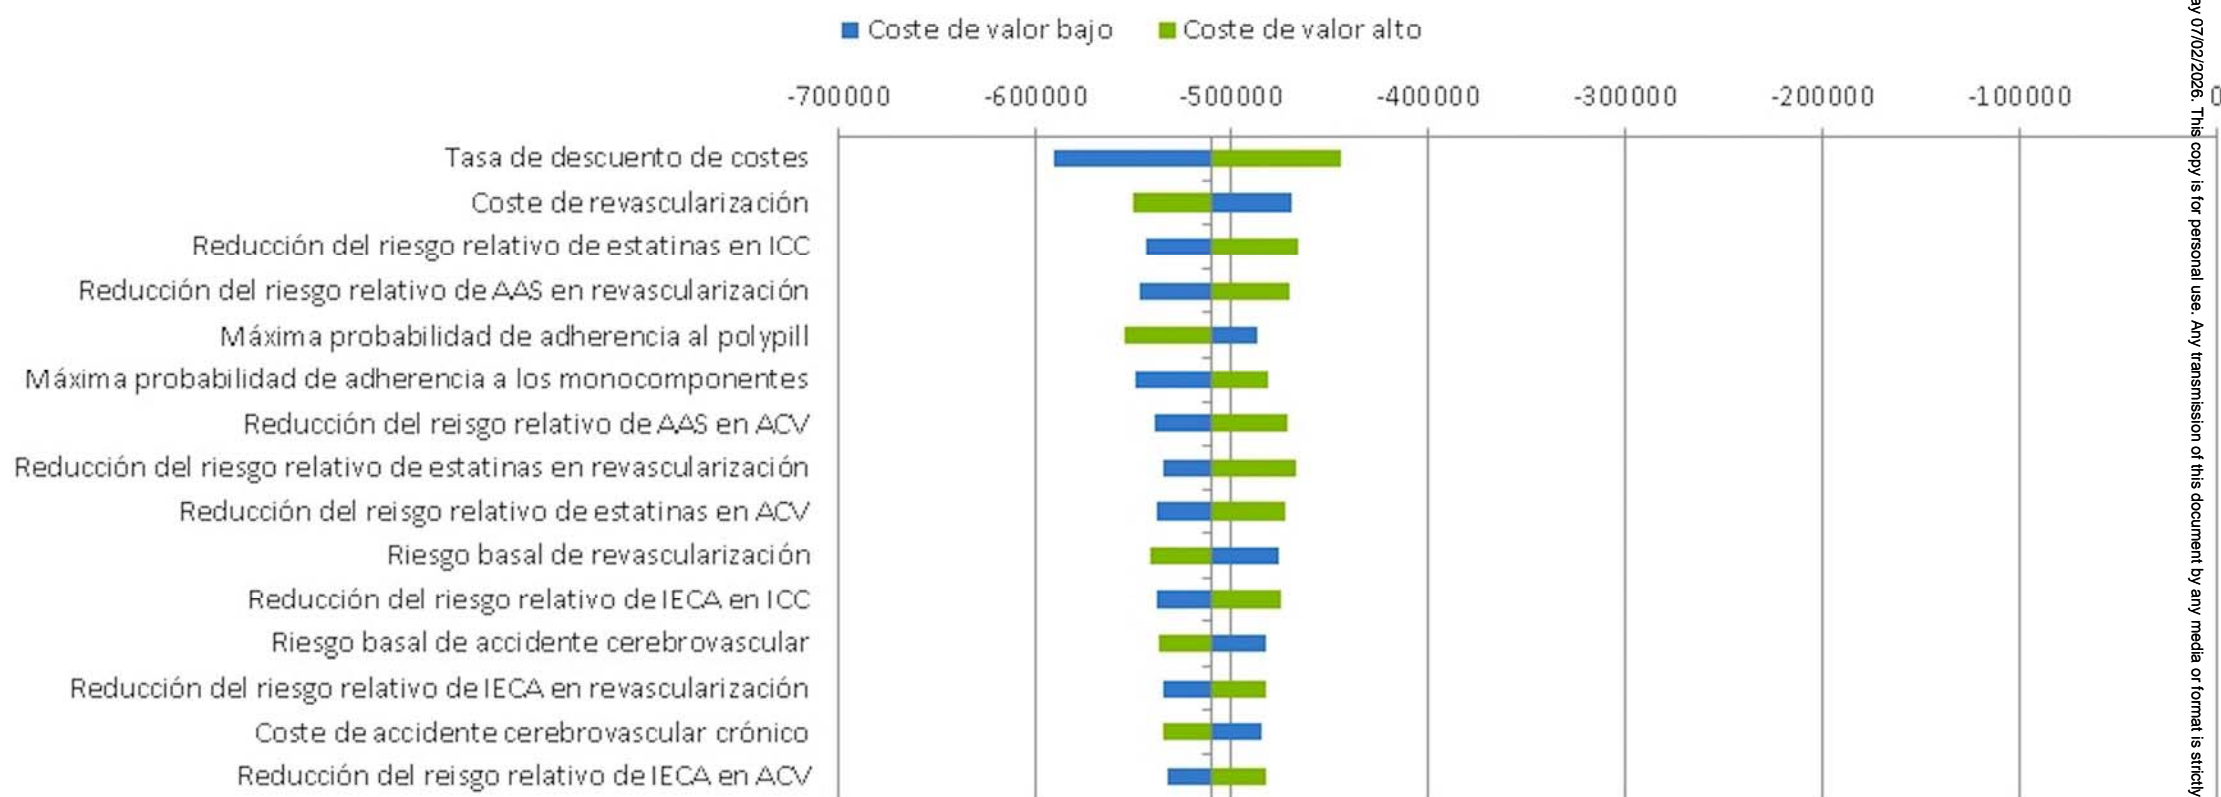

### Resultados incrementales (Policomprimido vs. monocomponentes)

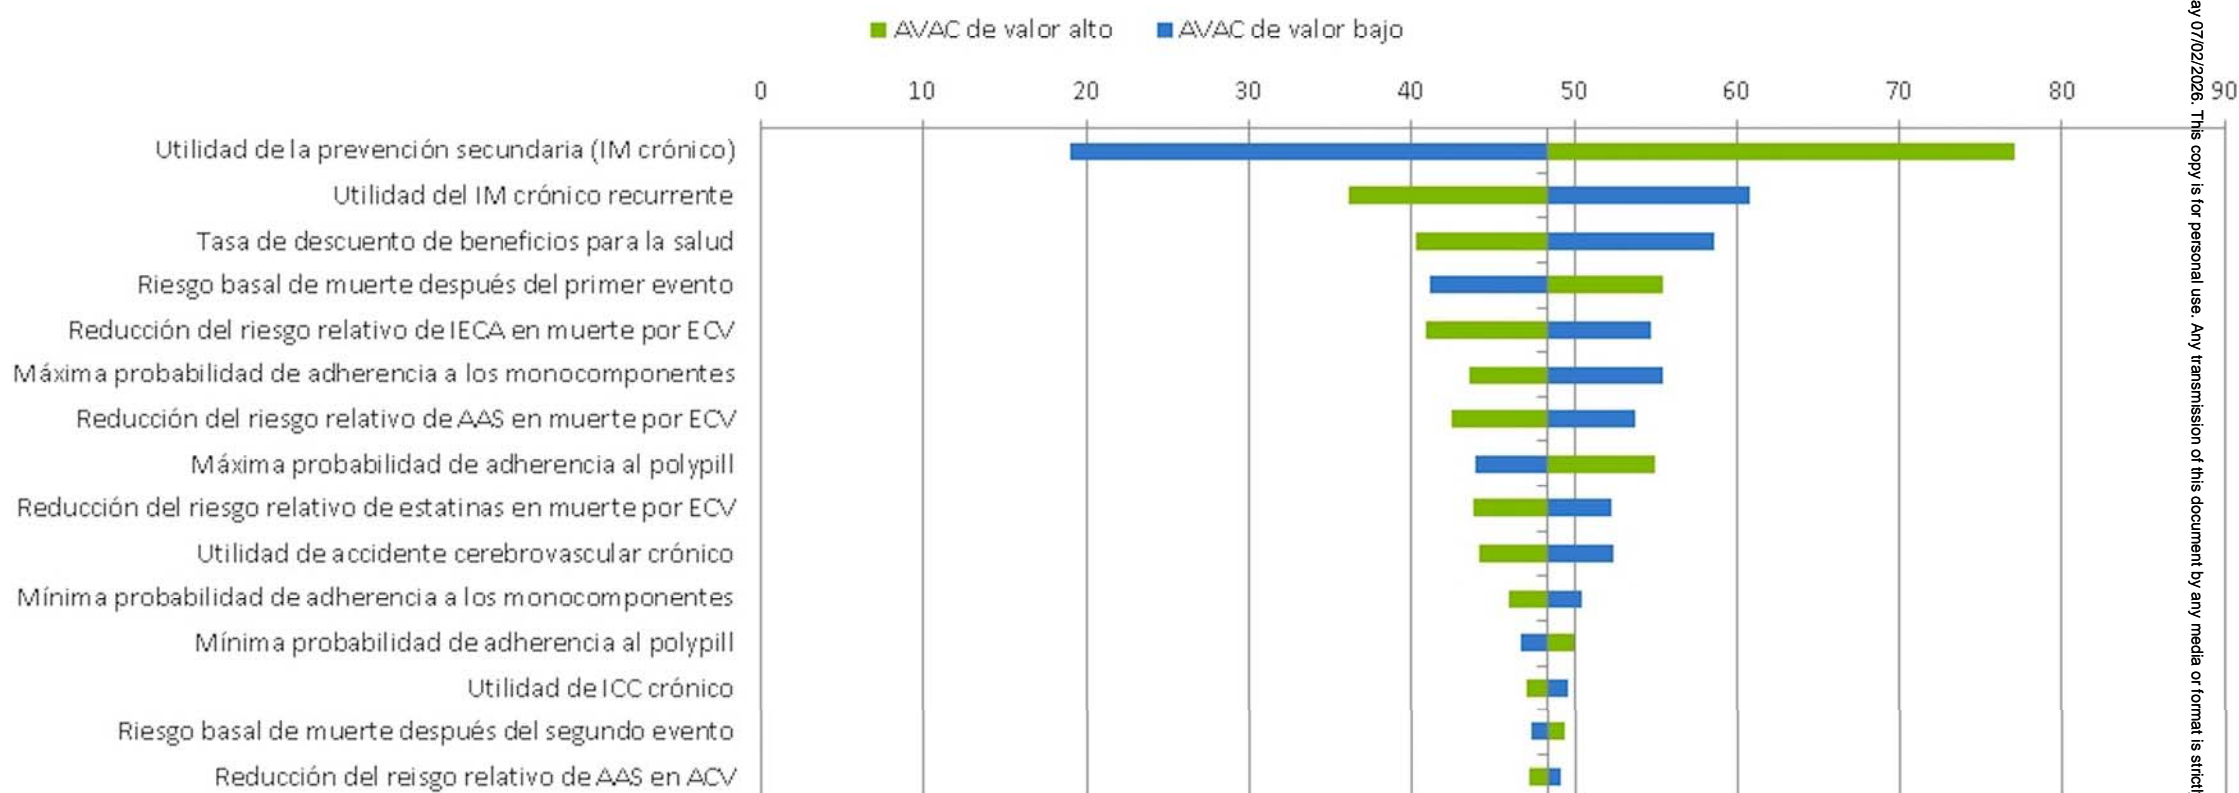

Supplement: mmc1 [file S1885585716301517:mmc1.pdf]
